# Supplementary material for: On the Thermal and Thermodynamic (In)Stability of Methylammonium Lead Halide Perovskites
Source: PubMed Central journal article supplement (PMC4992962; doi:10.1038/srep31896), 2016-08-22
Supplement: srep31896-s1.pdf [file srep31896-s1.pdf]

Supplementary Information to the Manuscript

# On the Thermal and Thermodynamic (In)Stability of Methylammonium Lead Halide Perovskites

Bruno Brunetti, Carmen Cavallo, Andrea Ciccio<sup>\*</sup>, Guido Gigli, Alessandro Latini<sup>\*</sup>

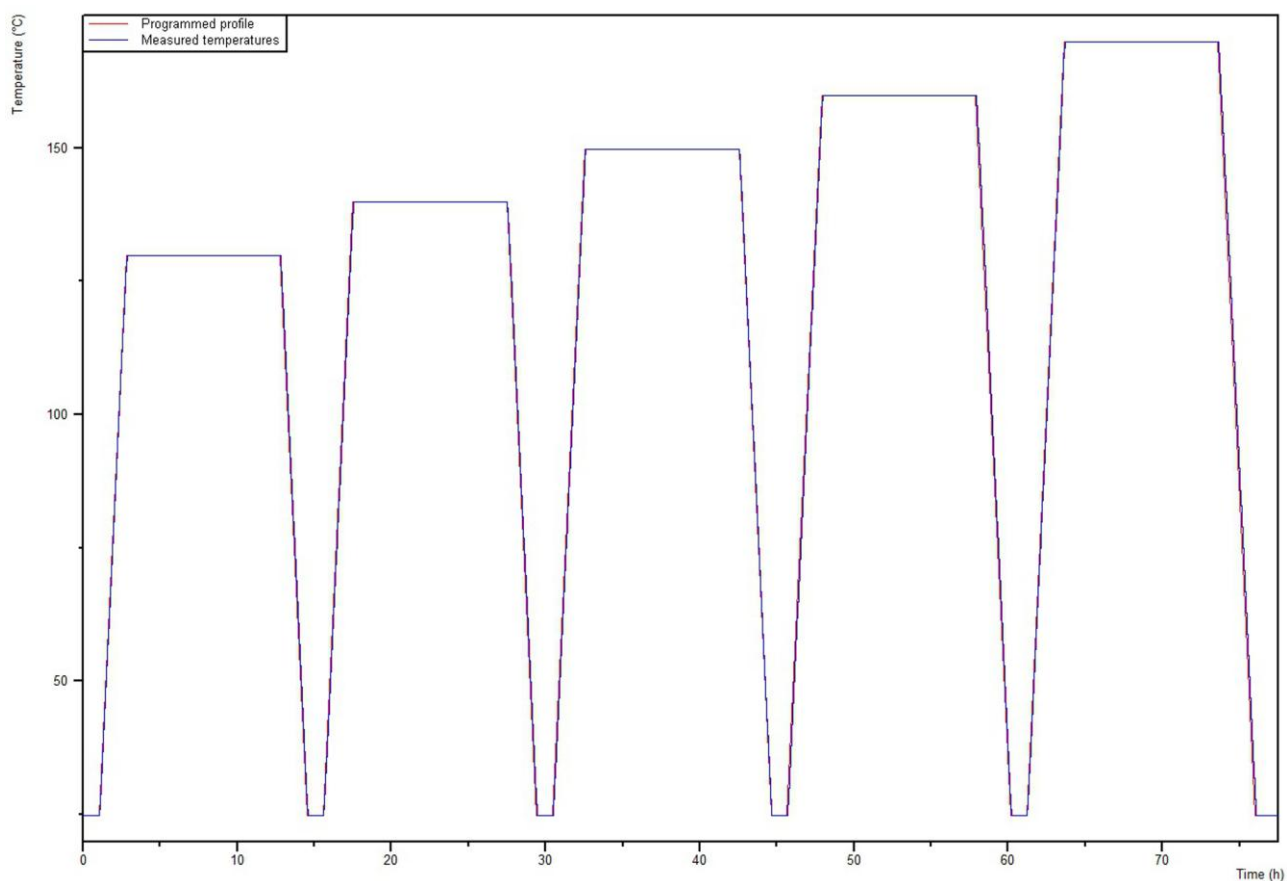

Figure S1. Thermal profile used during the non-ambient X-ray diffraction measurements.

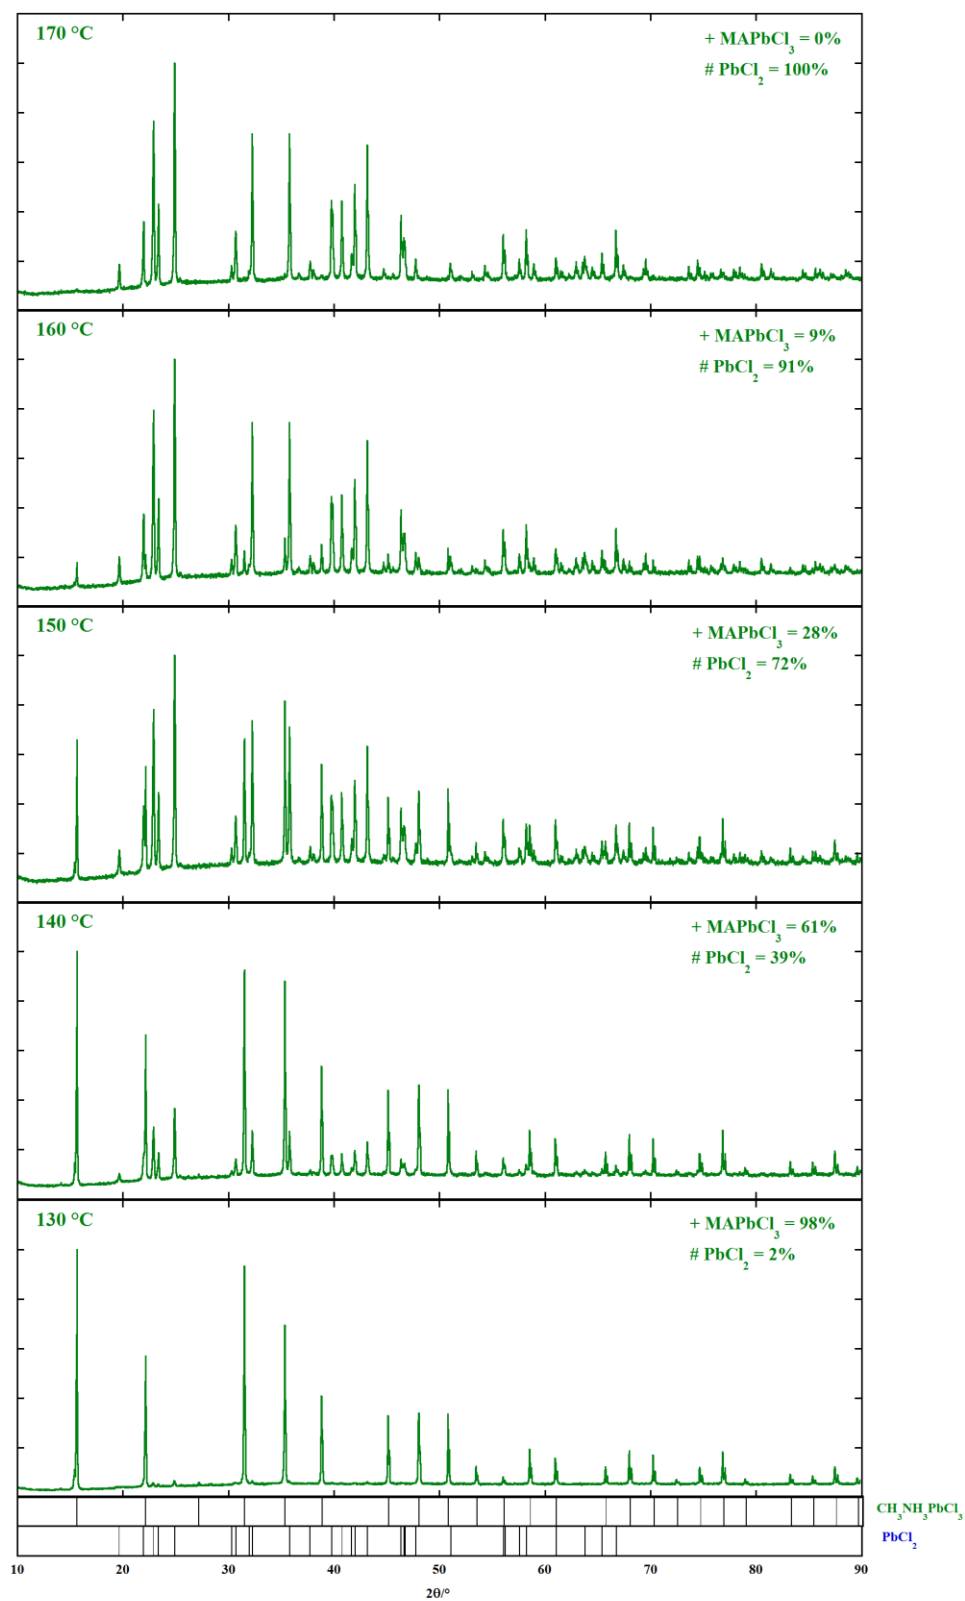

Figure S2. Magnification of the diffraction patterns of MAPbCl<sub>3</sub> taken after each isotherm compared with the reference reflections of MAPbCl<sub>3</sub> and PbCl<sub>2</sub>.

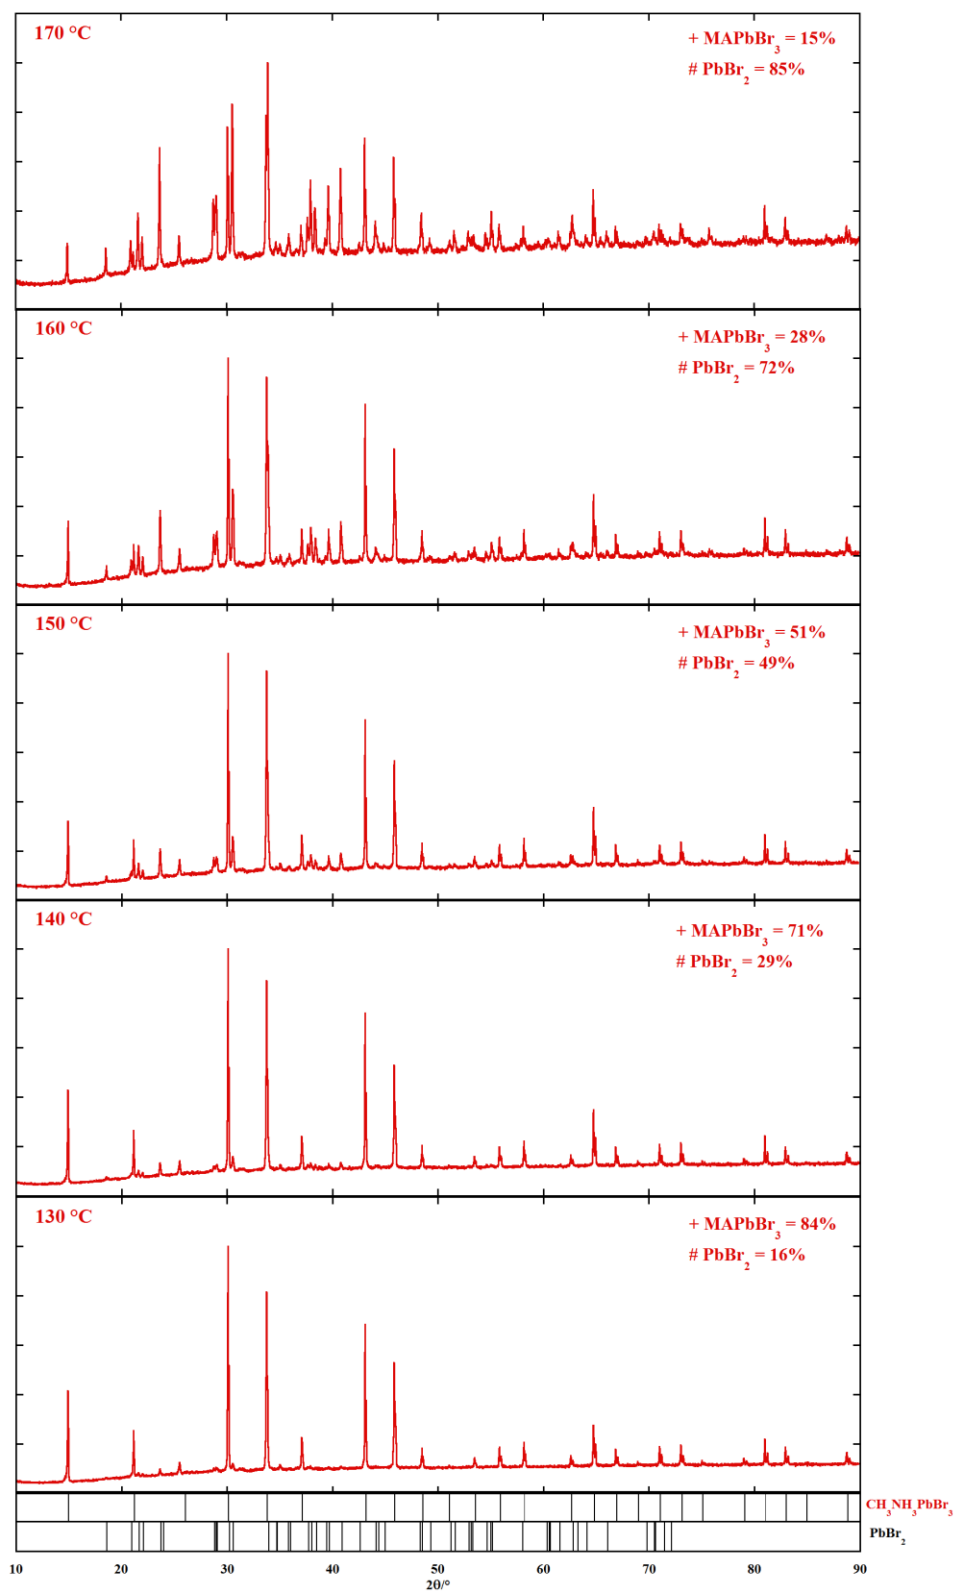

Figure S3. Magnification of the diffraction patterns of MAPbBr<sub>3</sub> taken after each isotherm compared with the reference reflections of MAPbBr<sub>3</sub> and PbBr<sub>2</sub>.

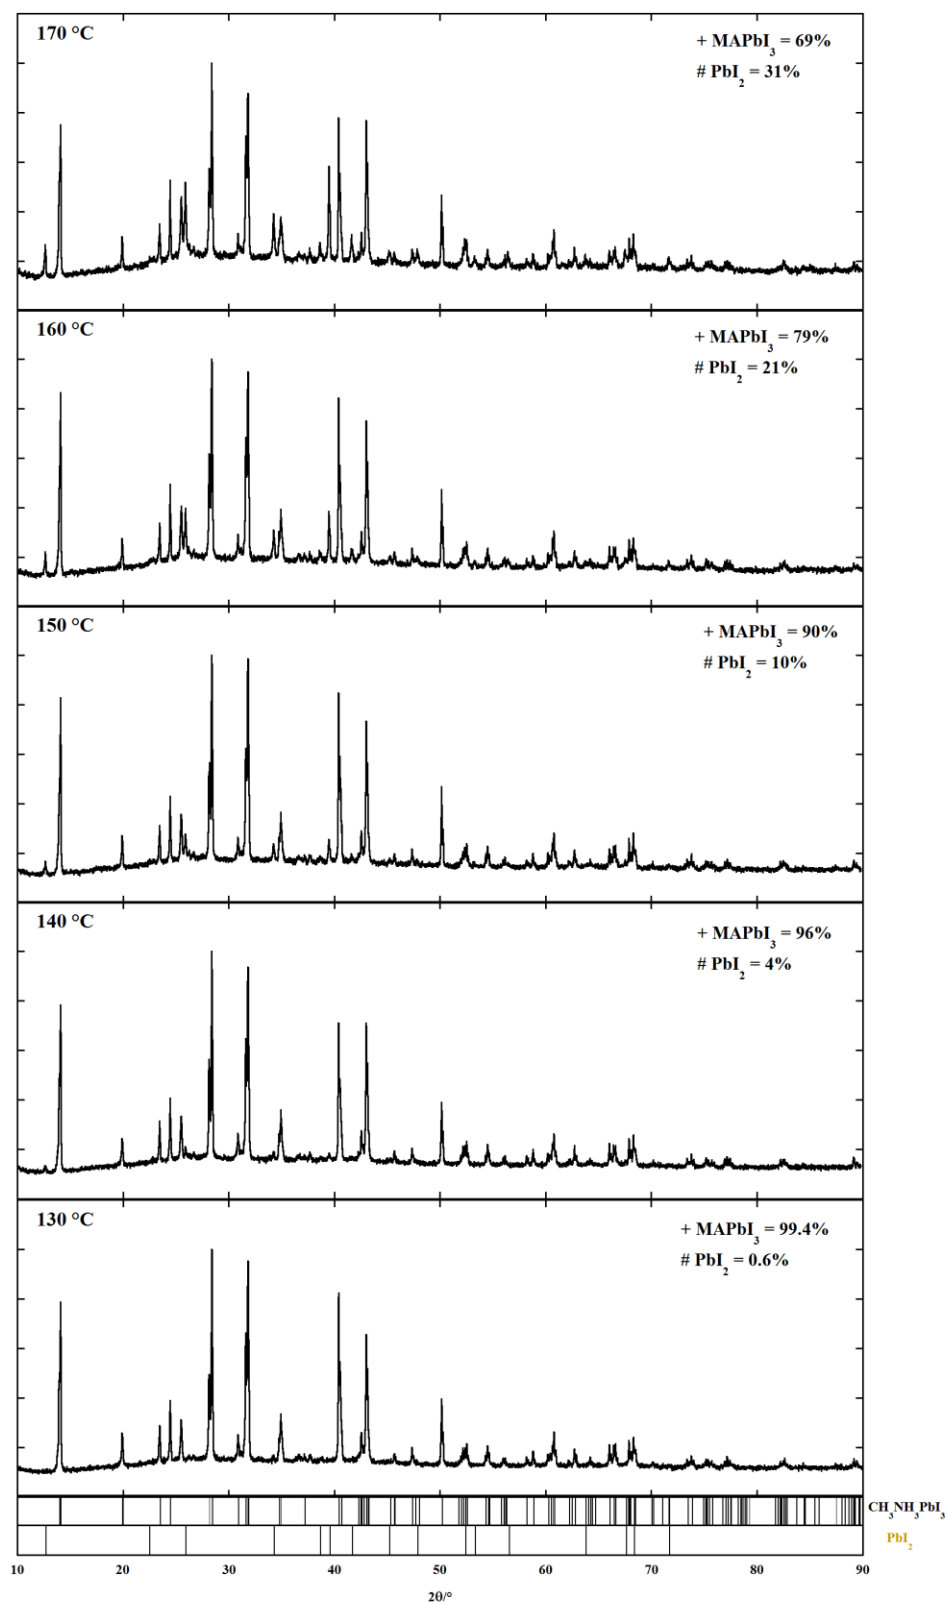

Figure S4. Magnification of the diffraction patterns of MAPbI<sub>3</sub> taken after each isotherm compared with the reference reflections of MAPbI<sub>3</sub> and PbI<sub>2</sub>.

Table 1. Partial pressures (in bar) derived from KEMS measurements.

| T/K | P(HCl)   | P(MetAm) | T/K | P(HBr)   | P(MetAm) | T/K | P(HI)    | P(MetAm) |
|-----|----------|----------|-----|----------|----------|-----|----------|----------|
| 353 | 5.40E-08 | 2.35E-08 | 371 | 1.48E-08 | 1.32E-08 | 360 | 7.24E-09 | 1.20E-09 |
| 324 | 2.54E-09 | 9.42E-10 | 396 | 1.97E-07 | 4.35E-08 | 343 | 1.41E-09 | 1.94E-10 |
| 337 | 1.51E-08 | 4.32E-09 | 394 | 2.02E-07 | 4.18E-08 | 371 | 1.51E-08 | 2.30E-09 |
| 369 | 3.11E-07 | 9.08E-08 | 409 | 4.60E-07 | 9.49E-08 |     |          |          |
|     |          |          | 410 | 5.00E-07 | 9.78E-08 |     |          |          |
|     |          |          | 377 | 4.33E-08 | 8.99E-09 |     |          |          |
|     |          |          |     |          |          | 389 | 1.39E-07 | 2.79E-08 |
| 339 | 3.82E-08 | 6.67E-08 | 372 | 3.59E-08 | 3.07E-08 | 406 | 3.60E-07 | 7.95E-08 |
| 372 | 2.09E-07 | 3.35E-07 | 377 | 5.20E-08 | 4.15E-08 | 406 | 3.25E-07 | 7.95E-08 |
| 387 | 9.02E-07 | 9.20E-07 | 397 | 2.38E-07 | 1.93E-07 | 373 | 2.53E-08 | 5.24E-09 |
| 324 | 2.56E-09 | 3.90E-09 | 410 | 5.09E-07 | 4.18E-07 | 356 | 4.62E-09 | 1.14E-09 |
|     |          |          | 412 | 5.97E-07 | 4.65E-07 |     |          |          |
| 356 | 8.73E-08 | 9.26E-08 | 427 | 1.18E-06 | 6.58E-07 | 343 | 1.40E-09 | 4.08E-10 |
| 372 | 3.47E-07 | 3.49E-07 | 380 | 3.28E-08 | 3.24E-08 | 342 | 1.16E-09 | 3.19E-10 |
| 387 | 1.12E-06 | 1.09E-06 |     |          |          | 375 | 2.80E-08 | 7.32E-09 |
| 323 | 2.52E-09 | 4.48E-09 | 412 | 7.06E-07 | 5.66E-07 | 390 | 9.20E-08 | 2.34E-08 |
|     |          |          | 415 | 8.48E-07 | 6.46E-07 | 390 | 1.06E-07 | 2.34E-08 |
| 339 | 1.74E-08 | 1.78E-08 | 399 | 2.14E-07 | 1.36E-07 | 356 | 4.84E-09 | 1.22E-09 |
| 376 | 4.85E-07 | 4.64E-07 |     |          |          | 356 | 4.08E-09 | 1.22E-09 |
| 394 | 1.70E-06 | 1.60E-06 |     |          |          |     |          |          |
| 328 | 4.51E-09 | 6.36E-09 | 387 | 9.18E-08 | 4.26E-08 | 326 | 1.41E-10 | 5.99E-11 |
|     |          |          | 403 | 3.13E-07 | 1.36E-07 | 326 | 1.56E-10 | 9.11E-11 |
| 347 | 4.89E-08 | 4.74E-08 | 403 | 3.13E-07 | 1.39E-07 | 374 | 2.98E-08 | 7.00E-09 |
| 359 | 7.71E-08 | 8.31E-08 |     |          |          | 374 | 3.14E-08 | 7.00E-09 |
|     |          |          | 424 | 1.47E-06 | 6.56E-07 | 407 | 3.63E-07 | 7.42E-08 |
|     |          |          | 424 | 1.47E-06 | 7.38E-07 |     |          |          |
|     |          |          | 424 | 1.42E-06 | 6.70E-07 |     |          |          |
|     |          |          | 424 | 1.42E-06 | 6.01E-07 |     |          |          |
|     |          |          | 373 | 2.98E-08 | 1.52E-08 |     |          |          |
|     |          |          | 357 | 6.19E-09 | 3.33E-09 |     |          |          |
|     |          |          |     |          |          |     |          |          |
|     |          |          | 374 | 4.74E-08 | 2.86E-08 |     |          |          |
|     |          |          | 436 | 4.07E-06 | 1.72E-06 |     |          |          |
|     |          |          | 439 | 2.37E-06 | 1.07E-06 |     |          |          |

Table 2. Total pressures measured in KEML experiments. For each system, data with effusion holes of 1 and 3 mm in diameter are reported in sequence.

| Chloride |                       | Bromide |                       | Iodide |                       |
|----------|-----------------------|---------|-----------------------|--------|-----------------------|
| T/K      | P <sub>tot</sub> /bar | T/K     | P <sub>tot</sub> /bar | T/K    | P <sub>tot</sub> /bar |
| 402      | 7.16E-06              | 387     | 1.35E-07              | 387    | 1.15E-07              |
| 397      | 5.68E-06              | 382     | 1.04E-07              | 392    | 2.20E-07              |
| 393      | 3.75E-06              | 388     | 1.58E-07              | 397    | 3.56E-07              |
| 388      | 2.49E-06              | 392     | 2.11E-07              | 402    | 4.60E-07              |
| 383      | 1.66E-06              | 397     | 3.03E-07              | 399    | 3.55E-07              |
| 378      | 1.14E-06              | 402     | 4.97E-07              | 394    | 2.51E-07              |
| 373      | 7.59E-07              | 407     | 6.76E-07              | 389    | 1.52E-07              |
| 368      | 5.66E-07              | 412     | 9.13E-07              | 385    | 1.20E-07              |
| 381      | 1.24E-06              | 417     | 1.35E-06              | 380    | 6.37E-08              |
| 386      | 2.09E-06              | 422     | 2.03E-06              | 374    | 3.93E-08              |
| 391      | 2.92E-06              | 392     | 2.02E-07              | 382    | 8.85E-08              |
| 393      | 3.75E-06              | 397     | 2.94E-07              | 387    | 1.31E-07              |
| 383      | 1.70E-06              | 402     | 4.47E-07              | 392    | 2.33E-07              |
| 378      | 1.26E-06              | 407     | 6.51E-07              | 397    | 2.72E-07              |
| 373      | 7.66E-07              |         |                       | 402    | 4.10E-07              |
| 376      | 9.07E-07              | 382     | 7.94E-08              | 399    | 3.66E-07              |
| 381      | 1.40E-06              | 378     | 6.33E-08              | 394    | 2.18E-07              |
| 386      | 2.06E-06              | 374     | 3.82E-08              | 389    | 1.44E-07              |
| 391      | 2.98E-06              | 370     | 2.86E-08              |        |                       |
| 393      | 3.38E-06              | 366     | 1.72E-08              | 392    | 4.52E-07              |
| 388      | 2.35E-06              | 362     | 1.14E-08              | 387    | 1.87E-07              |
| 380      | 1.55E-06              |         |                       | 383    | 1.07E-07              |
| 378      | 1.00E-06              |         |                       | 373    | 4.42E-08              |
| 373      | 7.42E-07              |         |                       | 363    | 1.68E-08              |
| 376      | 9.75E-07              |         |                       | 391    | 1.94E-07              |
| 381      | 1.41E-06              |         |                       | 386    | 1.07E-07              |
| 386      | 2.01E-06              |         |                       | 381    | 7.20E-08              |
| 391      | 2.89E-06              |         |                       | 378    | 5.31E-08              |
| 393      | 3.32E-06              |         |                       | 371    | 2.47E-08              |
| 390      | 2.63E-06              |         |                       | 368    | 1.98E-08              |
| 385      | 1.76E-06              |         |                       | 389    | 1.10E-07              |
| 392      | 2.98E-06              |         |                       | 384    | 7.52E-08              |
| 387      | 2.07E-06              |         |                       | 379    | 4.80E-08              |
| 382      | 1.39E-06              |         |                       |        |                       |
| 377      | 9.28E-07              |         |                       |        |                       |
| 373      | 6.48E-07              |         |                       |        |                       |
| 375      | 7.99E-07              |         |                       |        |                       |
| 352      | 1.05E-07              |         |                       |        |                       |
| 351      | 9.00E-08              |         |                       |        |                       |
| 349      | 7.48E-08              |         |                       |        |                       |

Table 3. Thermodynamic functions of the perovskite phases extrapolated from values reported in Ref. 28.

| T/K                                                    | $C_p^\circ / R$ | $(H_T^\circ - H_0^\circ) / RT$ | $S_T^\circ / R$ | $(G_T^\circ - H_0^\circ) / RT$ |
|--------------------------------------------------------|-----------------|--------------------------------|-----------------|--------------------------------|
| <b>CH<sub>3</sub>NH<sub>3</sub>PbCl<sub>3(s)</sub></b> |                 |                                |                 |                                |
| 310                                                    | 20.49           | 17.00                          | 38.49           | -21.49                         |
| 320                                                    | 20.51           | 17.11                          | 39.14           | -22.03                         |
| 330                                                    | 20.53           | 17.21                          | 39.77           | -22.55                         |
| 340                                                    | 20.56           | 17.31                          | 40.39           | -23.07                         |
| 350                                                    | 20.57           | 17.40                          | 40.98           | -23.57                         |
| 360                                                    | 20.59           | 17.49                          | 41.56           | -24.06                         |
| 370                                                    | 20.61           | 17.57                          | 42.13           | -24.54                         |
| 380                                                    | 20.62           | 17.65                          | 42.68           | -25.06                         |
| 390                                                    | 20.64           | 17.73                          | 43.21           | -25.47                         |
| 400                                                    | 20.65           | 17.80                          | 43.74           | -25.92                         |
| 410                                                    | 20.66           | 17.87                          | 44.25           | -26.36                         |
| 420                                                    | 20.67           | 17.94                          | 44.74           | -26.80                         |
| 430                                                    | 20.68           | 18.00                          | 45.23           | -27.22                         |
| 440                                                    | 20.69           | 18.06                          | 45.71           | -27.63                         |
| 450                                                    | 20.70           | 18.12                          | 46.17           | -28.04                         |
| <b>CH<sub>3</sub>NH<sub>3</sub>PbBr<sub>3(s)</sub></b> |                 |                                |                 |                                |
| 310                                                    | 20.52           | 17.63                          | 42.81           | -25.19                         |
| 320                                                    | 20.53           | 17.72                          | 43.46           | -25.75                         |
| 330                                                    | 20.55           | 17.80                          | 44.10           | -26.29                         |
| 340                                                    | 20.56           | 17.88                          | 44.71           | -26.83                         |
| 350                                                    | 20.57           | 17.96                          | 45.31           | -27.35                         |
| 360                                                    | 20.58           | 18.03                          | 45.89           | -27.85                         |
| 370                                                    | 20.59           | 18.10                          | 46.45           | -28.35                         |

|                                                       |       |       |       |        |
|-------------------------------------------------------|-------|-------|-------|--------|
| 380                                                   | 20.60 | 18.17 | 47.00 | -28.88 |
| 390                                                   | 20.60 | 18.23 | 47.53 | -29.30 |
| 400                                                   | 20.61 | 18.29 | 48.06 | -29.77 |
| 410                                                   | 20.62 | 18.35 | 48.56 | -30.22 |
| 420                                                   | 20.62 | 18.40 | 49.06 | -30.66 |
| 430                                                   | 20.63 | 18.45 | 49.55 | -31.10 |
| 440                                                   | 20.63 | 18.50 | 50.02 | -31.52 |
| 450                                                   | 20.64 | 18.55 | 50.48 | -31.94 |
|                                                       |       |       |       |        |
| <b>CH<sub>3</sub>NH<sub>3</sub>PbI<sub>3(s)</sub></b> |       |       |       |        |
| 370                                                   | 21.66 | 18.99 | 49.94 | -30.95 |
| 380                                                   | 21.66 | 19.06 | 50.52 | -31.51 |
| 390                                                   | 21.67 | 19.13 | 51.08 | -31.95 |
| 400                                                   | 21.68 | 19.19 | 51.63 | -32.44 |
| 410                                                   | 21.68 | 19.26 | 52.17 | -32.91 |
| 420                                                   | 21.69 | 19.31 | 52.69 | -33.38 |
| 430                                                   | 21.69 | 19.37 | 53.20 | -33.83 |
| 440                                                   | 21.70 | 19.42 | 53.70 | -34.28 |
| 450                                                   | 21.70 | 19.47 | 54.19 | -34.72 |
